# Supplementary material for: Body-Mass Index and Mortality in Korean Men and Women
Source: Atypon-hosted journal article supplement (doi:10.1056/nejmoa054017), 2006-08-23
Supplement: nejmoa054017sa1.pdf [file nejmoa054017sa1.pdf]

## Supplementary Appendix

This appendix has been provided by the authors to give readers additional information about their work.

Supplement to: Jee SH, Sull JW, Park J, et al. Body-mass index and mortality in Korean men and women. *N Engl J Med* 2006;355:779-87.

**Supplementary Table I. Number of events and age-adjusted hazard ratios (95% confidence interval) for selected causes of death in men by BMI categories, Korean Cancer Prevention Study, 1993-2004.**

|                      | Body Mass Index (kg/m <sup>2</sup> ) |                          |                          |                           |              |                          |                          |                          |                         |                         |
|----------------------|--------------------------------------|--------------------------|--------------------------|---------------------------|--------------|--------------------------|--------------------------|--------------------------|-------------------------|-------------------------|
|                      | <18.5                                | 18.5–19.9                | 20.0-21.4                | 21.5-22.9                 | 23.0-24.9    | 25.0-26.4                | 26.5-27.9                | 28.0-29.9                | 30.0-31.9               | ≥32.0                   |
| <b>Never smokers</b> |                                      |                          |                          |                           |              |                          |                          |                          |                         |                         |
| All Cause            | 414<br>1.3<br>(1.2-1.4)              | 812<br>1.1<br>(1.0-1.2)  | 1423<br>1.0<br>(1.0-1.1) | 1912<br>1.0<br>(0.9-1.1)  | 2568<br>1.0  | 1308<br>1.0<br>(0.9-1.1) | 697<br>1.1<br>(1.0-1.2)  | 370<br>1.1<br>(1.0-1.3)  | 111<br>1.5<br>(1.3-1.9) | 42<br>2.5<br>(1.8-3.5)  |
| Cancer               | 101<br>0.9<br>(0.7-1.2)              | 263<br>1.1<br>(0.9-1.2)  | 475<br>1.1<br>(0.9-1.1)  | 627<br>1.0<br>(0.9-1.1)   | 899<br>1.0   | 495<br>1.1<br>(1.0-1.2)  | 255<br>1.2<br>(1.0-1.3)  | 133<br>1.2<br>(1.0-1.5)  | 41<br>1.7<br>(1.2-2.3)  | 14<br>2.5<br>(1.4-4.3)  |
| Cardiovascular       | 48<br>0.7<br>(0.5-0.9)               | 120<br>0.8<br>(0.6-1.0)  | 249<br>0.9<br>(0.7-1.0)  | 312<br>0.8<br>(0.7-0.9)   | 526<br>1.0   | 254<br>0.9<br>(0.8-1.1)  | 175<br>1.3<br>(1.1-1.6)  | 102<br>1.5<br>(1.2-1.9)  | 33<br>2.1<br>(1.5-3.0)  | 15<br>4.1<br>(2.4-7.2)  |
| Respiratory          | 70<br>6.0<br>(4.2-8.7)               | 73<br>3.2<br>(2.3-4.6)   | 71<br>1.8<br>(1.3-2.6)   | 69<br>1.4<br>(1.0-2.0)    | 64<br>1.0    | 25<br>0.7<br>(0.4-1.2)   | 14<br>0.7<br>(0.4-1.4)   | 2<br>0.2<br>(0.1-0.9)    | 1<br>—*                 | 0<br>—*                 |
| <b>Ever smokers</b>  |                                      |                          |                          |                           |              |                          |                          |                          |                         |                         |
| All Cause            | 3247<br>1.4<br>(1.3-1.4)             | 5679<br>1.2<br>(1.1-1.2) | 9318<br>1.2<br>(1.1-1.2) | 10106<br>1.1<br>(1.1-1.1) | 11418<br>1.0 | 4996<br>1.0<br>(0.9-1.0) | 2399<br>1.0<br>(0.9-1.0) | 1094<br>1.0<br>(1.0-1.1) | 288<br>1.1<br>(1.0-1.3) | 110<br>2.1<br>(1.7-2.5) |
| Cancer               | 1064<br>1.1<br>(1.0-1.2)             | 2034<br>1.1<br>(1.0-1.1) | 3600<br>1.1<br>(1.1-1.2) | 3993<br>1.0<br>(1.0-1.1)  | 4689<br>1.0  | 2016<br>0.9<br>(0.9-1.0) | 984<br>1.0<br>(0.9-1.0)  | 417<br>1.0<br>(0.9-1.1)  | 112<br>1.1<br>(0.9-1.3) | 37<br>1.6<br>(1.2-2.3)  |
| Cardiovascular       | 447<br>0.9<br>(0.7-0.9)              | 882<br>0.9<br>(0.8-0.9)  | 1472<br>0.9<br>(0.9-1.0) | 1742<br>1.0<br>(0.9-1.0)  | 2201<br>1.0  | 1040<br>1.1<br>(1.0-1.2) | 520<br>1.1<br>(1.0-1.2)  | 256<br>1.3<br>(1.1-1.5)  | 68<br>1.4<br>(1.1-1.8)  | 24<br>2.4<br>(1.6-3.6)  |
| Respiratory          | 399<br>4.5<br>(3.8-5.3)              | 390<br>2.4<br>(2.1-2.9)  | 449<br>2.0<br>(1.7-2.3)  | 347<br>1.4<br>(1.2-1.6)   | 311<br>1.0   | 115<br>0.8<br>(0.7-1.0)  | 33<br>0.5<br>(0.3-0.7)   | 5<br>0.2<br>(0.1-0.4)    | 4<br>—*                 | 0<br>—*                 |

Results for ever smokers were further adjusted for smoking status and amount smoked (past smoker or current smoker of 1–9, 10–19, or ≥20 cigarettes per day).

\* The number of respiratory deaths in participants with BMI ≥ 30 was too small to reliably estimate relative risks.

**Supplementary Table II. Number of events and age-adjusted hazard ratios (95% confidence interval) for selected causes of death in never smoking women, by BMI category, Korean Cancer Prevention Study, 1993-2004.**

|                | Body Mass Index (kg/ m <sup>2</sup> ) |           |           |           |           |           |           |           |           |           |
|----------------|---------------------------------------|-----------|-----------|-----------|-----------|-----------|-----------|-----------|-----------|-----------|
|                | <18.5                                 | 18.5-19.9 | 20.0-21.4 | 21.5-22.9 | 23.0-24.9 | 25.0-26.4 | 26.5-27.9 | 28.0-29.9 | 30.0-31.9 | ≥32.0     |
| All Cause      | 1015                                  | 1649      | 2558      | 3168      | 4340      | 2390      | 1606      | 1158      | 426       | 248       |
|                | 1.2                                   | 1.1       | 1.0       | 1.0       | 1.0       | 1.0       | 1.0       | 1.1       | 1.2       | 1.2       |
|                | (1.1-1.3)                             | (1.0-1.1) | (1.0-1.0) | (1.0-1.1) |           | (0.9-1.0) | (1.0-1.1) | (1.1-1.2) | (1.1-1.3) | (1.1-1.4) |
| Cancer         | 254                                   | 496       | 688       | 978       | 1415      | 781       | 536       | 387       | 137       | 69        |
|                | 1.0                                   | 1.0       | 0.8       | 0.9       | 1.0       | 1.0       | 1.1       | 1.2       | 1.2       | 1.2       |
|                | (0.9-1.1)                             | (0.9-1.1) | (0.7-0.9) | (0.9-1.0) |           | (0.9-1.1) | (1.0-1.2) | (1.1-1.3) | (1.0-1.4) | (1.0-1.6) |
| Cardiovascular | 189                                   | 318       | 595       | 754       | 1076      | 624       | 411       | 308       | 126       | 67        |
|                | 0.8                                   | 0.8       | 0.9       | 1.0       | 1.0       | 1.0       | 1.1       | 1.2       | 1.4       | 1.4       |
|                | (0.7-1.0)                             | (0.7-0.9) | (0.8-1.0) | (0.9-1.1) |           | (0.9-1.1) | (0.9-1.2) | (1.0-1.4) | (1.1-1.7) | (1.1-1.8) |
| Respiratory    | 62                                    | 70        | 92        | 98        | 122       | 66        | 32        | 22        | 7         | 0         |
|                | 1.8                                   | 1.4       | 1.2       | 1.1       | 1.0       | 1.0       | 0.8       | 0.7       | —*        | —*        |
|                | (1.3-2.6)                             | (1.0-1.9) | (0.9-1.6) | (0.8-1.4) |           | (0.7-1.3) | (0.5-1.1) | (0.4-1.1) |           |           |

\* The number of respiratory deaths in participants with BMI ≥ 30 was too small to reliably estimate relative risks.

**Supplementary Table III. Hazard ratios\* and 95% confidence intervals for all cause death by BMI category, Korean Cancer Prevention Study, 1993-2004.**

| BMI, kg/m <sup>2</sup> | Men              |                      |                                                 | Women            |                      |                                                 |
|------------------------|------------------|----------------------|-------------------------------------------------|------------------|----------------------|-------------------------------------------------|
|                        | Age-adjusted     | Covariate adjusted** | Covariate and intermediate variable adjusted*** | Age-adjusted     | Covariate adjusted** | Covariate and intermediate variable adjusted*** |
| <18.5                  | 1.43 (1.37-1.49) | 1.35 (1.30-1.41)     | 1.51 (1.45-1.57)                                | 1.23 (1.16-1.31) | 1.16 (1.09-1.23)     | 1.25 (1.18-1.33)                                |
| 18.5 to 19.9           | 1.23 (1.20-1.27) | 1.19 (1.15-1.23)     | 1.28 (1.24-1.32)                                | 1.14 (1.09-1.20) | 1.11 (1.05-1.17)     | 1.17 (1.11-1.23)                                |
| 20.0 to 21.4           | 1.20 (1.17-1.23) | 1.16 (1.13-1.20)     | 1.21 (1.18-1.25)                                | 1.02 (0.97-1.07) | 0.99 (0.95-1.04)     | 1.02 (0.98-1.07)                                |
| 21.5 to 22.9           | 1.10 (1.07-1.13) | 1.09 (1.06-1.12)     | 1.12 (1.09-1.15)                                | 1.01 (0.97-1.05) | 1.00 (0.95-1.04)     | 1.02 (0.97-1.06)                                |
| 23.0 to 24.9           | 1.00             | 1.0                  | 1.00                                            | 1.00             | 1.00                 | 1.00                                            |
| 25.0 to 26.4           | 0.96 (0.93-0.99) | 0.97 (0.94-1.00)     | 0.95 (0.92-0.98)                                | 0.98 (0.94-1.03) | 0.98 (0.94-1.03)     | 0.96 (0.92-1.01)                                |
| 26.5 to 27.9           | 0.98 (0.94-1.02) | 0.99 (0.95-1.03)     | 0.95 (0.91-0.99)                                | 1.03 (0.97-1.09) | 1.02 (0.97-1.08)     | 0.97 (0.92-1.03)                                |
| 28.0 to 29.9           | 1.05 (0.99-1.11) | 1.06 (1.00-1.12)     | 0.97 (0.92-1.03)                                | 1.08 (1.02-1.15) | 1.09 (1.02-1.16)     | 1.03 (0.96-1.09)                                |
| 30.0 to 31.9           | 1.22 (1.10-1.35) | 1.20 (1.08-1.34)     | 1.09 (0.98-1.21)                                | 1.16 (1.05-1.27) | 1.16 (1.06-1.28)     | 1.07 (0.97-1.18)                                |
| ≥ 32.0                 | 2.13 (1.80-2.51) | 2.11 (1.78-2.50)     | 1.82 (1.54-2.16)                                | 1.21 (1.08-1.37) | 1.22 (1.08-1.38)     | 1.11 (0.99-1.26)                                |

\* Table shows age-adjusted and fully-adjusted hazard for effect of BMI with 23.0 to 24.9 as reference category

\*\* Adjusting for age (continuous), cigarette smoking (never smoker, past smoker or current smoker of 1-9, 10-19, or ≥ 20 cigarettes per day for men and never smoker, past smoker or current smoker for women), alcohol drinking (none, 1-24, 25-49, 50-99, and 100 g/day or more for men and none or any for women), and exercise

\*\*\* Adjusting for age (continuous), cigarette smoking (never smoker, past smoker or current smoker of 1-9, 10-19, or ≥ 20 cigarettes per day for men and never smoker, past smoker or current smoker for women), alcohol drinking (none, 1-24, 25-49, 50-99, and 100 g/day or more for men and none or any for women), exercise, fasting blood glucose (continuous), systolic blood pressure (continuous), and serum cholesterol levels (continuous)

**Supplementary Table IV. Hazard ratios\* and 95% confidence intervals for cancer mortality by BMI category, Korean Cancer Prevention Study, 1993-2004.**

| BMI, kg/m <sup>2</sup> | Men              |                      |                                                 | Women            |                      |                                                 |
|------------------------|------------------|----------------------|-------------------------------------------------|------------------|----------------------|-------------------------------------------------|
|                        | Age-adjusted     | Covariate adjusted** | Covariate and intermediate variable adjusted*** | Age-adjusted     | Covariate adjusted** | Covariate and intermediate variable adjusted*** |
| <18.5                  | 1.16 (1.09-1.25) | 1.12 (1.04-1.20)     | 1.12 (1.04-1.20)                                | 1.10 (0.97-1.23) | 1.04 (0.92-1.17)     | 1.01 (0.89-1.14)                                |
| 18.5 to 19.9           | 1.12 (1.07-1.18) | 1.08 (1.02-1.14)     | 1.08 (1.02-1.14)                                | 1.02 (0.92-1.12) | 1.00 (0.90-1.10)     | 0.98 (0.88-1.08)                                |
| 20.0 to 21.4           | 1.14 (1.09-1.19) | 1.10 (1.06-1.15)     | 1.10 (1.05-1.15)                                | 0.87 (0.80-0.95) | 0.86 (0.79-0.93)     | 0.84 (0.77-0.92)                                |
| 21.5 to 22.9           | 1.05 (1.01-1.10) | 1.04 (1.00-1.09)     | 1.04 (1.00-1.09)                                | 0.95 (0.88-1.03) | 0.94 (0.87-1.02)     | 0.93 (0.86-1.01)                                |
| 23.0 to 24.9           | 1.00             | 1.0                  | 1.00                                            | 1.00             | 1.0                  | 1.00                                            |
| 25.0 to 26.4           | 0.95 (0.91-1.00) | 0.97 (0.92-1.01)     | 0.97 (0.92-1.01)                                | 0.98 (0.90-1.07) | 0.98 (0.90-1.07)     | 0.99 (0.91-1.08)                                |
| 26.5 to 27.9           | 0.99 (0.93-1.05) | 1.00 (0.93-1.06)     | 0.99 (0.93-1.06)                                | 1.08 (0.98-1.19) | 1.07 (0.97-1.18)     | 1.07 (0.97-1.19)                                |
| 28.0 to 29.9           | 1.01 (0.92-1.10) | 1.02 (0.93-1.12)     | 1.00 (0.91-1.10)                                | 1.13 (1.01-1.26) | 1.13 (1.01-1.26)     | 1.14 (1.02-1.27)                                |
| 30.0 to 31.9           | 1.15 (0.97-1.36) | 1.11 (0.93-1.32)     | 1.09 (0.92-1.30)                                | 1.17 (0.98-1.39) | 1.17 (0.98-1.39)     | 1.19 (1.00-1.42)                                |
| ≥ 32.0                 | 1.76 (1.32-2.34) | 1.76 (1.31-2.35)     | 1.71 (1.28-2.29)                                | 1.19 (0.95-1.50) | 1.22 (0.97-1.54)     | 1.24 (0.99-1.56)                                |

\* Table shows age-adjusted and fully-adjusted hazard for effect of BMI with 23.0 to 24.9 as reference category

\*\* Adjusting for age (continuous), cigarette smoking (never smoker, past smoker or current smoker of 1-9, 10-19, or ≥ 20 cigarettes per day for men and never smoker, past smoker or current smoker for women), alcohol drinking (none, 1-24, 25-49, 50-99, and 100 g/day or more for men and none or any for women), and exercise

\*\*\* Adjusting for age (continuous), cigarette smoking (never smoker, past smoker or current smoker of 1-9, 10-19, or ≥ 20 cigarettes per day for men and never smoker, past smoker or current smoker for women), alcohol drinking (none, 1-24, 25-49, 50-99, and 100 g/day or more for men and none or any for women), exercise, fasting blood glucose (continuous), systolic blood pressure (continuous), and serum cholesterol levels (continuous)

**Supplementary Table V. Hazard ratios\* and 95% confidence intervals for respiratory mortality by BMI category, Korean Cancer Prevention Study, 1993-2004.**

| BMI, kg/m2   | Men              |                      |                                                 | Women            |                      |                                                 |
|--------------|------------------|----------------------|-------------------------------------------------|------------------|----------------------|-------------------------------------------------|
|              | Age-adjusted     | Covariate adjusted** | Covariate and intermediate variable adjusted*** | Age-adjusted     | Covariate adjusted** | Covariate and intermediate variable adjusted*** |
| <18.5        | 4.82 (4.17-5.58) | 4.47 (3.85-5.20)     | 4.64 (3.98-5.40)                                | 2.19 (1.71-2.79) | 1.95 (1.52-2.50)     | 2.06 (1.60-2.64)                                |
| 18.5 to 19.9 | 2.60 (2.25-3.01) | 2.45 (2.12-2.84)     | 2.51 (2.17-2.92)                                | 1.62 (1.28-2.05) | 1.48 (1.17-1.88)     | 1.54 (1.21-1.97)                                |
| 20.0 to 21.4 | 1.97 (1.72-2.27) | 1.87 (1.63-2.16)     | 1.89 (1.64-2.18)                                | 1.11 (0.89-1.40) | 0.98 (0.78-1.25)     | 1.01 (0.80-1.28)                                |
| 21.5 to 22.9 | 1.38 (1.19-1.59) | 1.36 (1.18-1.57)     | 1.37 (1.18-1.59)                                | 1.08 (0.86-1.35) | 1.05 (0.84-1.31)     | 1.06 (0.85-1.33)                                |
| 23.0 to 24.9 | 1.00             | 1.0                  | 1.00                                            | 1.00             | 1.0                  | 1.00                                            |
| 25.0 to 26.4 | 0.80 (0.66-0.98) | 0.80 (0.65-0.98)     | 0.79 (0.65-0.97)                                | 0.89 (0.69-1.15) | 0.85 (0.66-1.11)     | 0.84 (0.65-1.10)                                |
| 26.5 to 27.9 | 0.51 (0.37-0.71) | 0.52 (0.37-0.72)     | 0.51 (0.37-0.71)                                | 0.78 (0.56-1.08) | 0.78 (0.56-1.08)     | 0.74 (0.53-1.04)                                |
| 28.0 to 29.9 | 0.17 (0.08-0.38) | 0.18 (0.08-0.41)     | 0.18 (0.08-0.39)                                | 0.83 (0.57-1.20) | 0.83 (0.57-1.21)     | 0.81 (0.56-1.17)                                |

\* Table shows age-adjusted and fully-adjusted hazard for effect of BMI with 23.0 to 24.9 as reference category. The number of respiratory deaths in participants with BMI  $\geq$  30 was too small to reliably estimate relative risks.

\*\* Adjusting for age (continuous), cigarette smoking (never smoker, past smoker or current smoker of 1-9, 10-19, or  $\geq$  20 cigarettes per day for men and never smoker, past smoker or current smoker for women), alcohol drinking (none, 1-24, 25-49, 50-99, and 100 g/day or more for men and none or any for women), and exercise

\*\*\* Adjusting for age (continuous), cigarette smoking (never smoker, past smoker or current smoker of 1-9, 10-19, or  $\geq$  20 cigarettes per day for men and never smoker, past smoker or current smoker for women), alcohol drinking (none, 1-24, 25-49, 50-99, and 100 g/day or more for men and none or any for women), exercise, fasting blood glucose (continuous), systolic blood pressure (continuous), and serum cholesterol levels (continuous)
